# Supplementary material for: Mesoporous LaFeO3: Synergistic Effect of Adsorption and Visible Light Photo-Fenton Processes for Phenol Removal from Refinery Wastewater
Source: Hindawi journal article supplement (doi:10.1155/2021/5841066), 2021-06-02
Supplement: f1 [file 5841066.f1.docx]

**Supplement Information**

**Mesoporous LaFeO3: synergistic effect of adsorption and visible light photo-Fenton processes for phenol removal from refinery wastewater**

Thi To Nga Phan 1*, Hong Lien Nguyen1, Van Tuyen Le1, Chi Nhan Phan2, Thanh Huyen Pham1

1. Department of Organic and Petrochemical Technology, School of Chemical Engineering, Hanoi University of Science and Technology, Ha Noi, Viet Nam.

2. Center for Chemical Accident Response and Safety, Vietnam Chemicals Agency, Ministry of Industry and Trade of the Socialist Republic of Viet Nam, Viet Nam.

*Corresponding authors. Telephone: +84 3 9466 9315, E-mail: [nga.phanthito@hust.edu.vn](mailto:nga.phanthito@hust.edu.vn) (T. Phan).


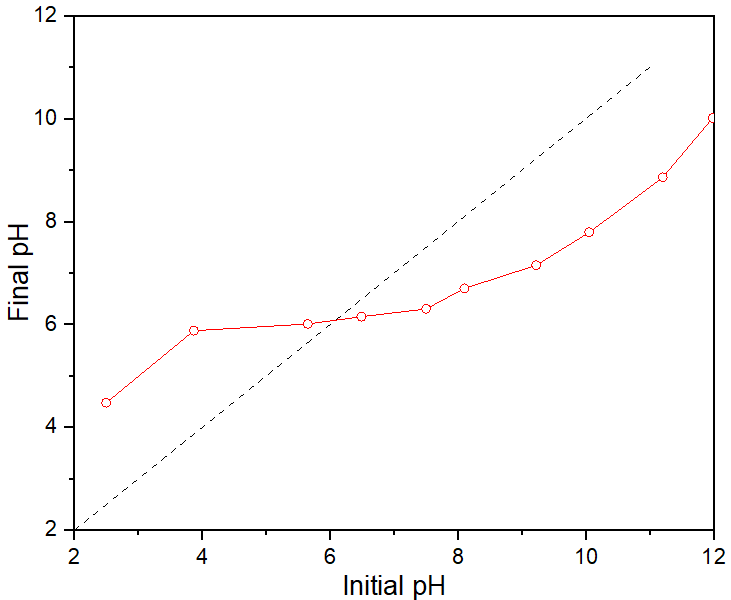


**Fig. S1**. The pH of point of zero charge of LFO-RHT
